# Supplementary material for: Correlation between Adrenoceptor Expression and Clinical Parameters in Degenerated Lumbar Intervertebral Discs
Source: MDPI journal article supplement (doi:10.3390/ijms232315358), 2022-12-05
Supplement: s1 [file s1]

## Supplementary material:

**Table S1.** Medians of expression values with interquartile ranges for the respective ARs and groups

| Receptor    | Group           | Median | 25 percentile | 75 percentile |
|-------------|-----------------|--------|---------------|---------------|
| $\alpha 1A$ | Modic 0-I       | 0,29   | 0,14          | 0,67          |
|             | Modic II-III    | 0,76   | 0,30          | 1,14          |
| $\alpha 2A$ | Modic 0-I       | 0,08   | 0,04          | 0,42          |
|             | Modic II-III    | 0,40   | 0,18          | 0,63          |
| $\beta 2$   | Modic 0-I       | 0,29   | 0,15          | 0,95          |
|             | Modic II-III    | 0,76   | 0,41          | 1,03          |
| $\alpha 1A$ | Pfarrmann II    | 0,07   | 0,00          | 0,14          |
|             | Pfarrmann III   | 0,29   | 0,16          | 0,67          |
|             | Pfarrmann IV    | 0,73   | 0,32          | 0,99          |
|             | Pfarrmann V     | 0,75   | 0,30          | 1,44          |
| $\alpha 2A$ | Pfarrmann II    | 0,04   | 0,00          | 0,08          |
|             | Pfarrmann III   | 0,17   | 0,04          | 0,42          |
|             | Pfarrmann IV    | 0,33   | 0,17          | 0,90          |
|             | Pfarrmann V     | 0,50   | 0,18          | 0,81          |
| $\beta 2$   | Pfarrmann II    | 0,17   | 0,07          | 0,26          |
|             | Pfarrmann III   | 0,29   | 0,15          | 0,63          |
|             | Pfarrmann IV    | 0,73   | 0,62          | 1,03          |
|             | Pfarrmann V     | 0,76   | 0,35          | 1,44          |
| $\alpha 1A$ | NPRS < 7.5      | 0,74   | 0,41          | 1,12          |
|             | NPRS $\geq$ 7.5 | 0,23   | 0,13          | 0,77          |
| $\alpha 2A$ | NPRS < 7.5      | 0,36   | 0,12          | 0,62          |
|             | NPRS $\geq$ 7.5 | 0,19   | 0,06          | 0,61          |
| $\beta 2$   | NPRS < 7.5      | 0,78   | 0,31          | 1,31          |
|             | NPRS $\geq$ 7.5 | 0,42   | 0,21          | 0,77          |
| $\alpha 1A$ | ⊖-Blocker       | 0,30   | 0,16          | 0,62          |
|             | No ⊖-Blocker    | 0,76   | 0,34          | 1,50          |
| $\alpha 2A$ | ⊖-Blocker       | 0,20   | 0,08          | 0,41          |
|             | No b-Blocker    | 0,53   | 0,09          | 0,79          |
| $\beta 2$   | ⊖-Blocker       | 0,36   | 0,15          | 0,76          |
|             | No ⊖-Blocker    | 0,81   | 0,33          | 1,19          |
| $\alpha 1A$ | Nicotine        | 0,63   | 0,21          | 1,51          |

|             |             |      |      |      |
|-------------|-------------|------|------|------|
|             | No Nicotine | 0,45 | 0,19 | 0,90 |
| $\alpha$ 2A | Nicotine    | 0,17 | 0,00 | 0,81 |
|             | No Nicotine | 0,30 | 0,09 | 0,57 |
| $\beta$ 2   | Nicotine    | 0,69 | 0,30 | 1,28 |
|             | No Nicotine | 0,58 | 0,18 | 0,93 |
| $\alpha$ 1A | NSAID       | 0,73 | 0,28 | 1,11 |
|             | No NSAID    | 0,44 | 0,16 | 0,75 |
| $\alpha$ 2A | NSAID       | 0,45 | 0,17 | 0,75 |
|             | No NSAID    | 0,17 | 0,07 | 0,42 |
| $\beta$ 2   | NSAID       | 0,77 | 0,55 | 1,08 |
|             | No NSAID    | 0,31 | 0,19 | 0,81 |
| $\alpha$ 1A | ASD         | 0,18 | 0,14 | 0,28 |
|             | No ASD      | 0,62 | 0,25 | 0,98 |
| $\alpha$ 2A | ASD         | 0,42 | 0,08 | 1,00 |
|             | No ASD      | 0,22 | 0,07 | 0,57 |
| $\beta$ 2   | ASD         | 0,50 | 0,07 | 0,86 |
|             | No ASD      | 0,63 | 0,26 | 0,99 |

NPRS - Numeric pain rating scale; NSAID - Non-steroidal anti-inflammatory drugs ; ASD - Adjacent segment disease

**Figure S1:**

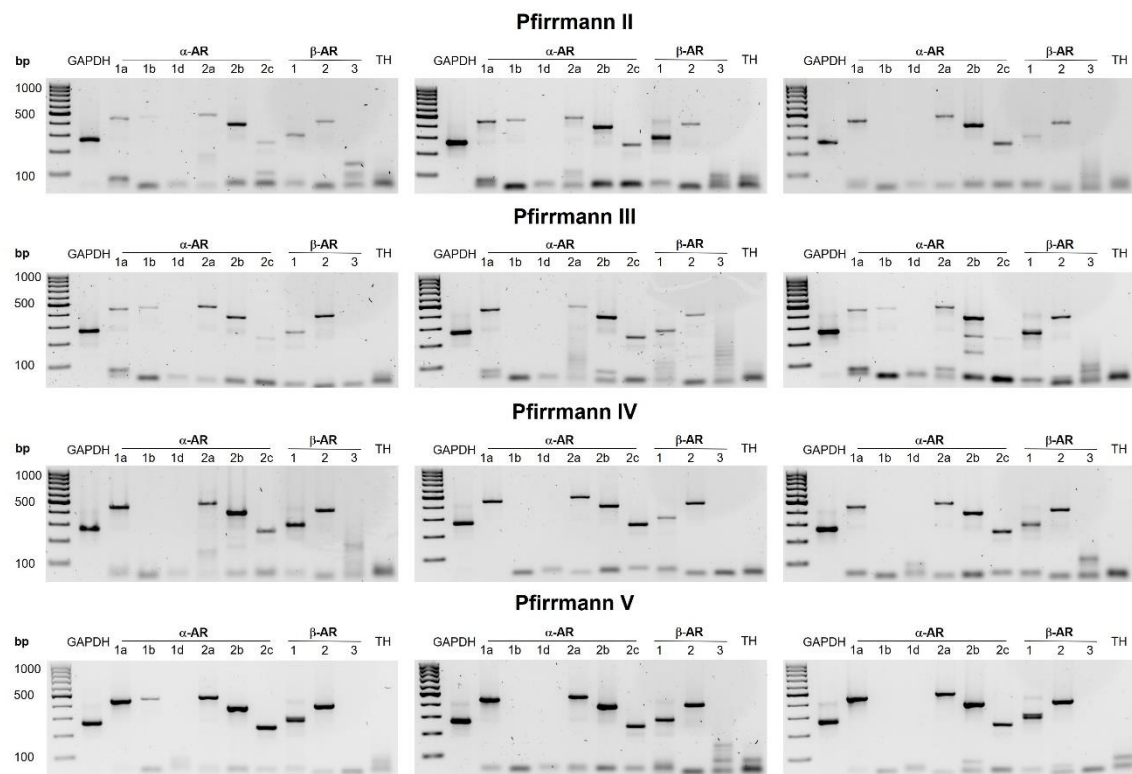

**Figure S1.** Adrenoceptor (AR) and tyrosine hydroxylase (TH) gene expression in human intervertebral disc tissue determined by RT-PCR. GAPDH was used as a housekeeping gene for normalization. RT-PCR gels were analyzed densitometrically based on the intensities of corresponding PCR bands. GAPDH band intensity of each individual patient was defined as “1” and AR expression levels were calculated in relation to that value.

Figure S2:

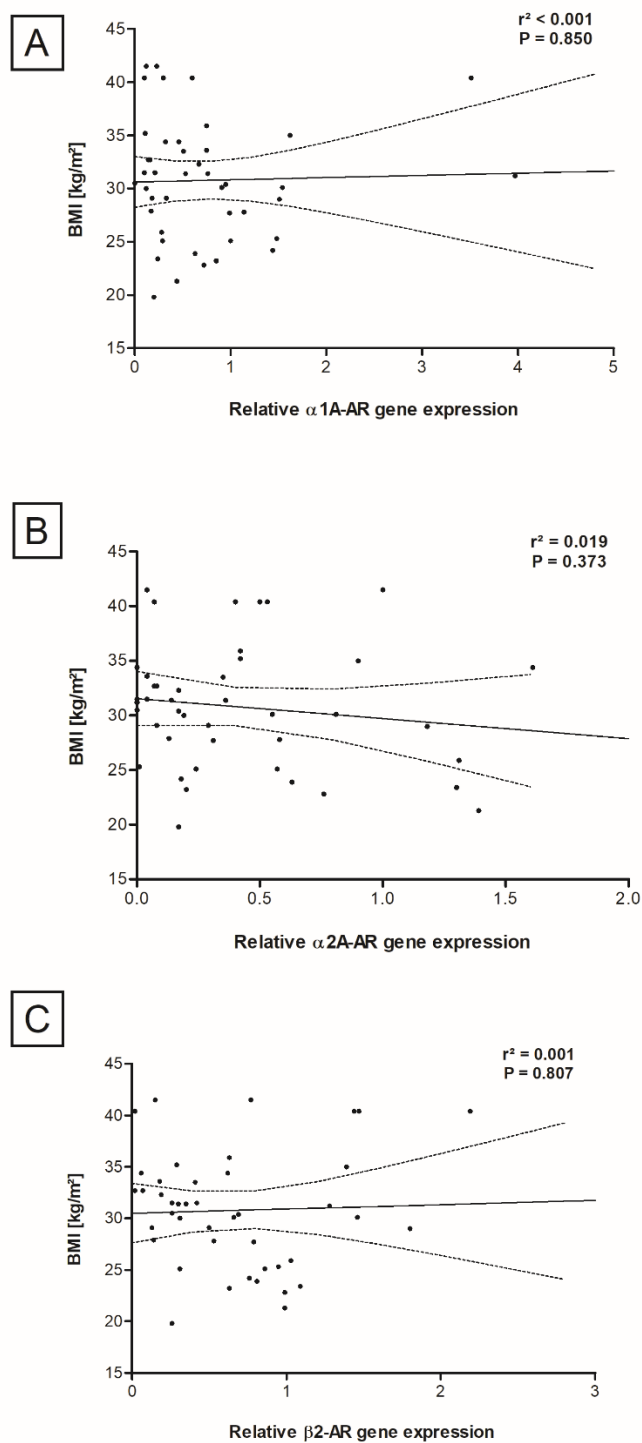

**Figure S2.** BMI and relative AR gene expression. Scatter diagrams of the relationship between BMI and relative  $\alpha1A$ -AR (A),  $\alpha2A$ -AR (B) and  $\beta2$ -AR gene expression (C). There was no correlation between BMI and AR expression. Each black dot represents an individual patient. Data represent medians with interquartile range.

**Figure S3:**

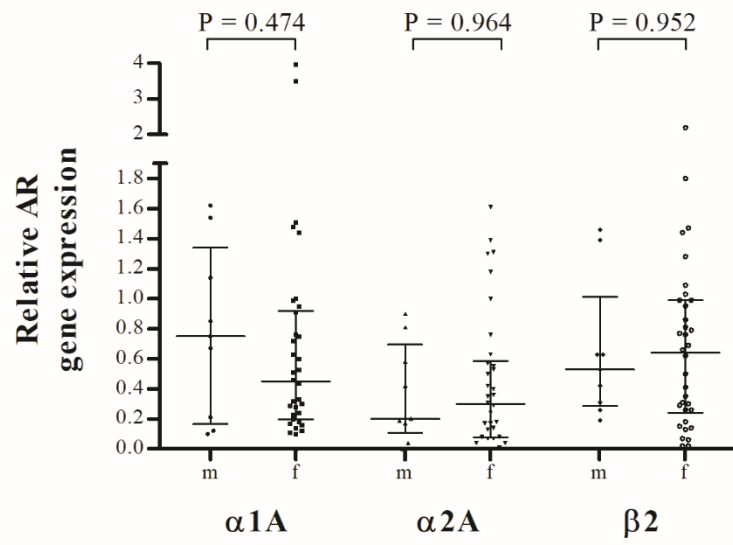

**Figure S3.** Interrelationship between relative  $\alpha 1A$ -,  $\alpha 2A$ -, and  $\beta 2$ -AR gene expression and sex (m – male; f – female). Each black dot represents an individual patient (n=43). Data represent medians with interquartile range.
